# Supplementary material for: Entwicklung eines Curriculums für Notfallpflege an der Charité
Source: Springer Nature journal article supplement (doi:10.1007/s10049-016-0255-5), 2017-01-11
Supplement: MOESM1 [file 11993734]

**Supplement Tabelle 1 (S1):** Übersicht über die verwendete Literatur für den konzeptuellen Rahmen des Curriculums (ausgewählte Ergebnisse der systematischen Literaturrecherche)

| Titel | Autoren | Jahr | Art der Publikation | Methodik | Ergebnisse | Relevanz für die Module in der Fachweiterbildung |
| --- | --- | --- | --- | --- | --- | --- |
| Status Quo – Notfallpflege in deutschen Notaufnahmen | Wedler K, Jahn P [44] | 2015 | Konzept-papier | Literatur-  recherche | - Überblick über die Qualifizierungsangebote in Deutschland,   - Überblick über die rechtlichen Empfehlungen. | - Empfehlungen für die Zielgruppe, Voraussetzungen, Dauer, Organisationsform und Inhalte der Fachweiterbildungen. |
| Empfehlung zur Fachweiterbildung Notfallpflege „DGINA AG Pflege“ | Wedler K, Friesdorf M, Dietz-Wittstock, M [45] | 2014 | Konzept-papier | Konsens-findung | - Curriculare Empfehlungen,  - Lerninhalte der leitsymptomorientierten Handlungsfelder. | - Berücksichtigung in den Modulen M 3.1- M 3.10 für den leitsymptomorientierten Aufbau, - Übernahme der empfohlenen Zulassungsvoraussetzungen. |
| European Curriculum for Emergency Medicine  (EuSEM) – Core Curriculum | Patrino R., Ohlen G., Williams, D. al. el. [41] | 2002 | Konzept-papier | Konsens-findung,  Literatur-  recherche (Triangulation) | - Überblick der Leitsymptome in der Notfallmedizin,   - Kernkompetenzen,   - Trainingsszenarien. | - Inhaltliche Anlehnung an die Leitsymptome in der Notfallmedizin in den Modulen M 3.1- M 3.10. |
| Rahmenlehrplan für Nachdiplomstudien der höheren Fachschulen. Anästhesiepflege, Intensivpflege, Notfallpflege in der Schweiz | Oda Santé [30] | 2012 | Adminis-  trative Festlegung | Konsens-findung | - Arbeitsfeld und Kontext der Fachrichtung Notfallpflege,  - Überblick der allgemeinen Arbeitsprozesse sowie der fachspezifischen Arbeitsprozesse. | - Berücksichtigung bei der inhaltlichen Struktur der allgemeinen und fachspezifischen Arbeitsprozesse für die Fachweiterbildung sowie der zu identifizierten Kernkompetenzen in dem Handlungsfeld. |
| Learning Outcomes for Health Professions: The Concept of the Swiss Competencies Framework | Sottas B. [39] | 2011 | Meinungs-papier | Konsens-findung | - Abschlusskompetenzen für Gesundheitsberufe,  - Gesundheitspolitisches Orientierungswissen,  - Berufsspezifische Expertise und Methodenkompetenz,  - Professionalität und Verantwortungsbewusstsein  - Fähigkeiten betreffend Kommunikation, Interaktion, Dokumentation. | -Berücksichtigung aller Module in der feincurricularen Struktur, prospektiv auf die nationale Bildungssystematik,  -Definition von berufsspezifischen Kompetenzen und Metakompetenzen für die Notaufnahme. |
| Der europäische Qualifikations-rahmen für lebenslanges Lernen | Europäische Kommission [17] | 2008 | Politische Vorgabe | Konsens-findung | - Zuordnung von formalen Qualifikationen der beruflichen Bildung (Learning Outcome) im internationalen Rahmen,  - Anerkennung der beruflichen Qualifikationen  - Handlungskompetenz. | - Dient als Transparenz-, Vergleichs- und Übersetzungsinstrument für die Lernergebnisse der einzelnen Module an den Rahmenbedingungen des Europäischen Qualifikationsrahmen (EQF),  - bietet die Grundlage für Mobilität und nationale Anerkennung der Module, Beweglichkeit der Teilnehmer im nationalen Bildungsraum. |
| DKG-Empfehlung zur pflegerischen Weiterbildung | Deutsche Kranken-hausgesell-schaft (DKG) [12] | 2015 | Konzept-papier | Konsens-findung | - Anforderungen an Weiterbildungsstätten,  - Dauer, Form, Gliederung, praktische Anteile und Leistungsnachweise einer Fachweiterbildung,  - Vorgaben zu Abschlussprüfungen. | - Modulare Struktur,  - Anforderungen an die Weiterbildungsstätte und die Eingangsvoraussetzungen wurden für die FWB berücksichtigt. |
| Pflegetheorien im Kontext curricularer Konzeption | Wagner M. [43] | 2011 | Fachbuch | Literatur-  recherche, Arbeit des Autors | - Überblick über die nationalen und internationalen Curriculumsmodelle und Strukturen,  -Offene vs. Geschlossene Curricula,  - Vorstellung von curricularen Konzeptionsmodellen. | - Definition des konzeptuellen Rahmens nach dem situationsanalytischen Ansatz,  - Festlegung einer ausbildungsbezogenen, offenen Struktur; Besonderheit: didaktische Variabilität, Taxonomie der Lernziele, bildungstheoretisches Grundverständnis. |
| Anasthesia is a model for addressing patient safety | Cooper JB, Gaba D [9] | 2002 | Originalie | Konsens-  findung, qualitative Befragung | - Bedeutung des Faktor Mensch in interprofessionellen Teams,  - Richtlinien zur Gestaltung von Teamtrainings. | - Ausrichtung des interprofessionellen Teamtrainings; Schnittstellenmanagement in den Modulen M 3.1 – M 3.10; Berücksichtigung der Crew Ressource Management (CRM) – Aspekte sowie des strukturierten Debriefings DASH®. |
| A feedback system in residency to evaluate CanMEDS roles and provide high-quality feedback | Renting N, Gans RO, Borleffs JC [32] | 2015 | Konzept-  papier | Konsens-  findung | - Modell operationalisiert die Rolle des Experten im Krankenhaus bezogen auf Communicator, Collaborator, Scholar, Health Advocate, Professional and Manager. | - Ableitung der Kernkompetenzen für die Fachweiterbildung Notfallpflege (Abb. 5). |
| Gemeinsame Pflegeausbildung. Modellversuch und Curriculum für die theoretische Ausbildung in der Alten-, Kranken- und Kinderkrankenpflege. | Oelke U. , Menge M. [31] | 2002 | Fach-  literatur | Explorative  Literatur-recherche, Arbeit des Autors | - Curriculares Modell entwickelt - Schwerpunkt liegt auf dem Hintergrund der kritisch- konstruktiven Handlungsforschung, - Begründung des Curriculum anhand seiner pflegedidaktischen Einordnung. | - Anlehnung der Entwicklungsphasen, Erkenntnisprozess und Evaluation des Curriculums, pflegedidaktische Einordnung. |
| Emergency Nursing Core Curriculum | ENA-Emergency  Nurses  Association [16] | 2007 | Fach-literatur | Explorative  Literatur-recherche, Experten-konsens | - Überblick auftretender Symptome in der Notfallmedizin,  - notfallpflegerische Kompetenzen. | - Definition der Handlungskompetenzen für die Fachweiterbildung,  - Berücksichtigung bei der inhaltlichen Planung der Module M 3.1 – M 3.10. |
